# Supplementary material for: One-step fabrication of robust fabrics with both-faced superhydrophobicity for the separation and capture of oil from water
Source: Royal Society of Chemistry journal article supplement (doi:10.1039/c5cp00154d), 2015-01-01
Supplement: c5cp00154d1.pdf [file c5cp00154d1.pdf]

Electronic Supplementary Information

**One-step fabrication of robust fabrics with both-faced  
superhydrophobicity for separation and capture oil from water**

Jian Li <sup>\*</sup>, Long Yan, Yuzhu Zhao, Fei Zha, Qingtao Wang, Ziqiang Lei

Key Laboratory of Eco-Environment-Related Polymer Materials, Ministry of  
Education of China, Key Laboratory of Gansu Polymer Materials, College of  
Chemistry and Chemical Engineering, Northwest Normal University, Lanzhou  
730070, China

Corresponding author email: [jianli83@126.com](mailto:jianli83@126.com);

### **Supplementary movie and figure captions:**

**Movie S1.** Both sides of the as-prepared fabrics show superhydrophobicity.

**Movie S2.** The separation process of oil (kerosene)/water mixture based on our superhydrophobic fabrics.

**Figure S1.** The low (a) and high (b) magnified FE-SEM images of the as-prepared superhydrophobic fabric after 40 cycles of oil/water separation.

**Figure S2.** Images of water droplets on the as-prepared superhydrophobic fabric: (a) pH = 1, (b) pH = 7 and (c) pH = 14.

**Figure S3.** Images of water droplets on the treated superhydrophobic fabric after immersed the fabrics into (a) 1 M HCl, (b) 1 M NaCl, (c) 1 M NaOH, (d) acetone, (e) toluene for 24 h and (f) boiling water for 1 h.

**Figure S4.** The low (a) and high (b) magnified FE-SEM images of the as-prepared superhydrophobic fabric scratched for 600 times.

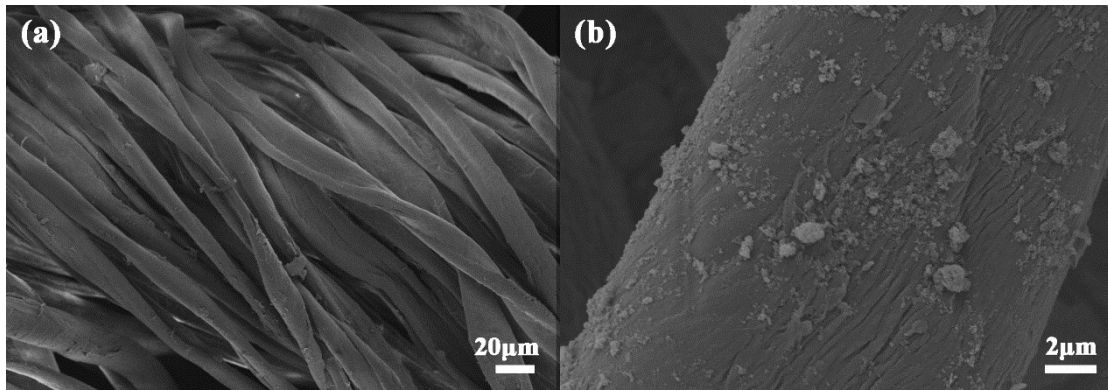

**Figure S1.** The low (a) and high (b) magnified FE-SEM images of the as-prepared superhydrophobic fabric after 40 cycles of oil/water separation.

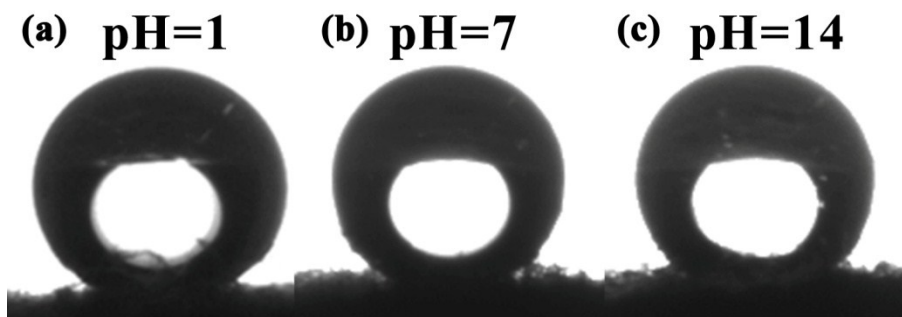

**Figure S2.** Images of water droplets on the as-prepared superhydrophobic fabric: (a) pH = 1, (b) pH = 7 and (c) pH = 14.

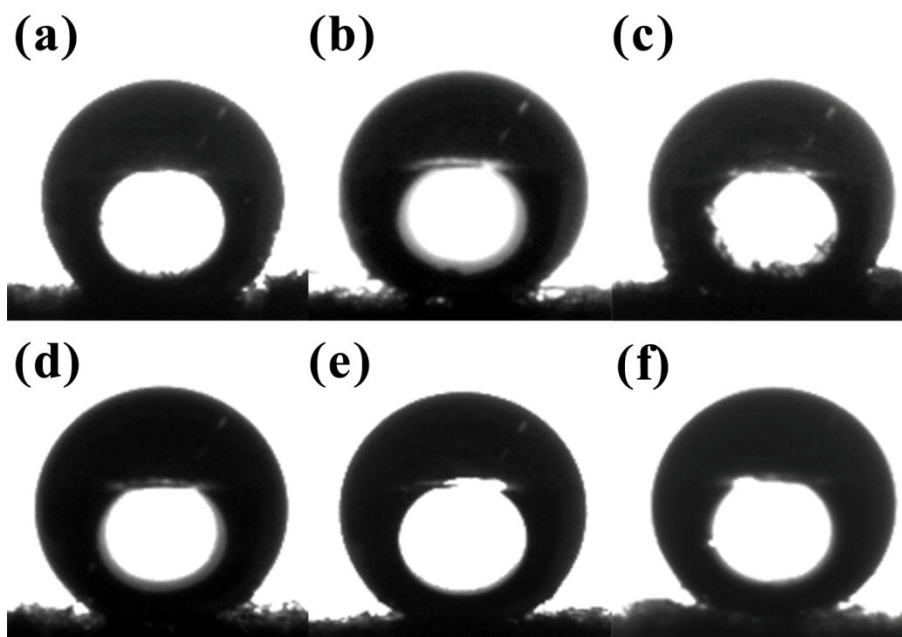

**Figure S3.** Images of water droplets on the treated superhydrophobic fabric after

immersed the fabrics into (a) 1 M HCl, (b) 1 M NaCl, (c) 1 M NaOH, (d) acetone, (e) toluene for 24 h and (f) boiling water for 1 h.

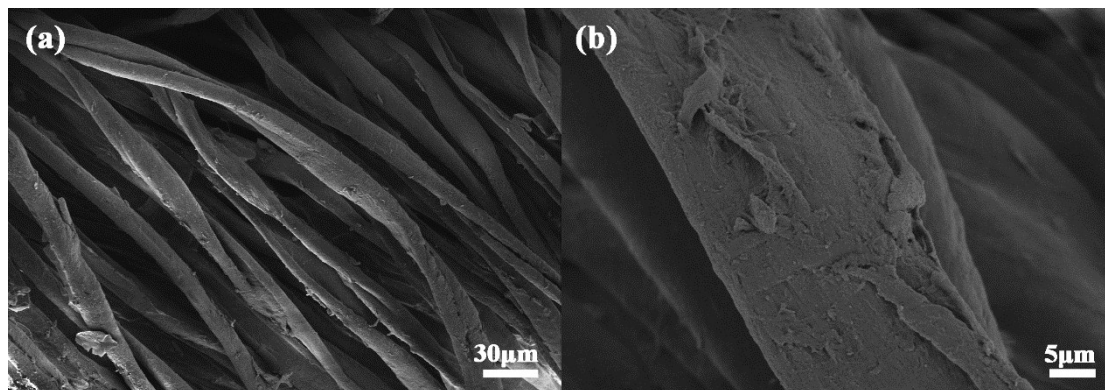

**Figure S4.** The low (a) and high (b) magnified FE-SEM images of the as-prepared superhydrophobic fabric scratched for 600 times.
